# Supplementary material
Source: PubMed Central journal article supplement (PMC8017535)
Supplement: ASN.2020060888SupplementaryData1.pdf [file ASN.2020060888SupplementaryData1.pdf]

**Supplementary Figure 1. Cumulative Incidence of Time to Deceased Donor Transplantation by Era**

**Supplementary Figure 2. Cumulative Incidence of Time to Living Donor Transplantation by Era**

**Supplementary Figure 3. Forest Plot of Multivariable Model for Preemptive Wait List Placement or Transplantation**

**Supplementary Figure 4. Forest Plot of Multivariable Model for Time to Wait List Placement or Transplantation after ESRD Onset**
